# Supplementary material for: Hydrogen-bonding modulation of excited-state properties of flavins in a model of aqueous confined environment
Source: Royal Society of Chemistry journal article supplement (doi:10.1039/c2pp05385c), 2012-03-22
Supplement: c2pp05385c.pdf [file c2pp05385c.pdf]

Revised Version ID-PP-ART-11-2011-005385

## Electronic Supporting Information (ESI)

### Hydrogen-bonding modulation of excited-state properties of flavins in a model of aqueous confined environment

Lorena Valle, Faustino E. Morán Vieyra, and Claudio D. Borsarelli\*

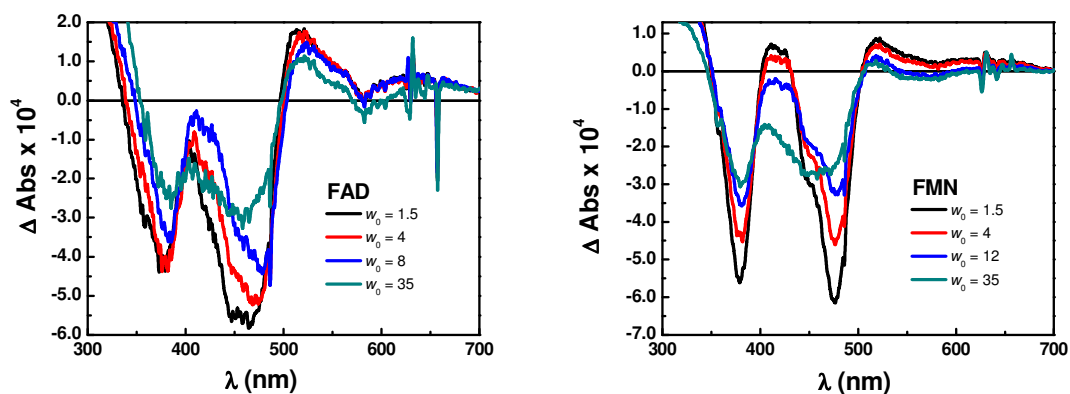

**Figure S1:** Difference absorption spectra ( $\Delta \text{Abs}$ ) of 7  $\mu\text{M}$  FAD and FMN in 0.1 M AOT

RM at different  $w_0$  values

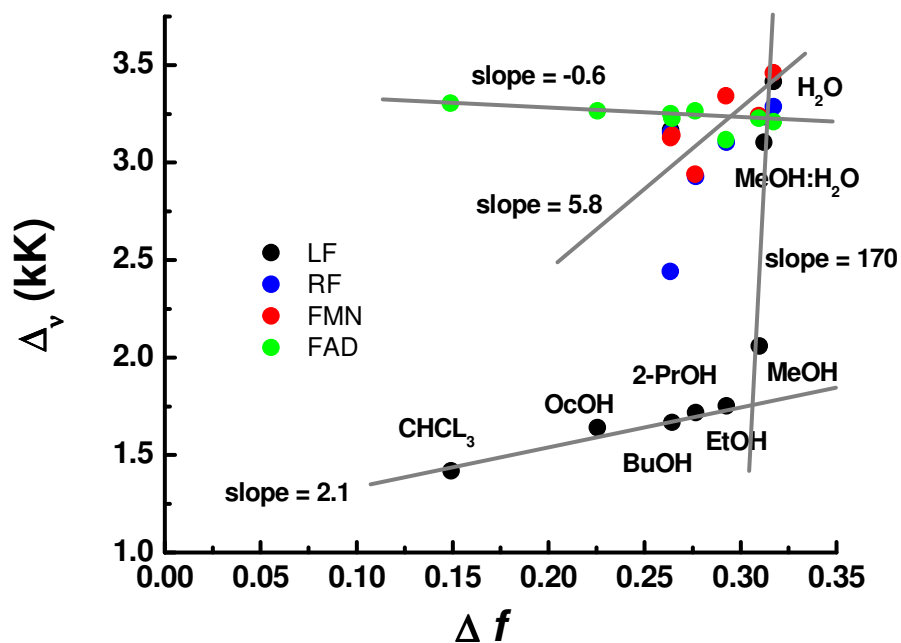

Mataga-Lippert eq.: 
$$\Delta\nu = \frac{2\Delta f}{hca^3}(\mu_E - \mu_G) + cte, \text{ with } \Delta f = \frac{\epsilon - 1}{2\epsilon + 1} - \frac{n^2 - 1}{2n - 1}$$

**Figure S2:** Mataga-Lippert plots of flavins in different homogeneous protic solvents:  
 $\text{H}_2\text{O}$ , methanol, ethanol, 1-butanol, 1-octanol, 2-propanol, chloroform.

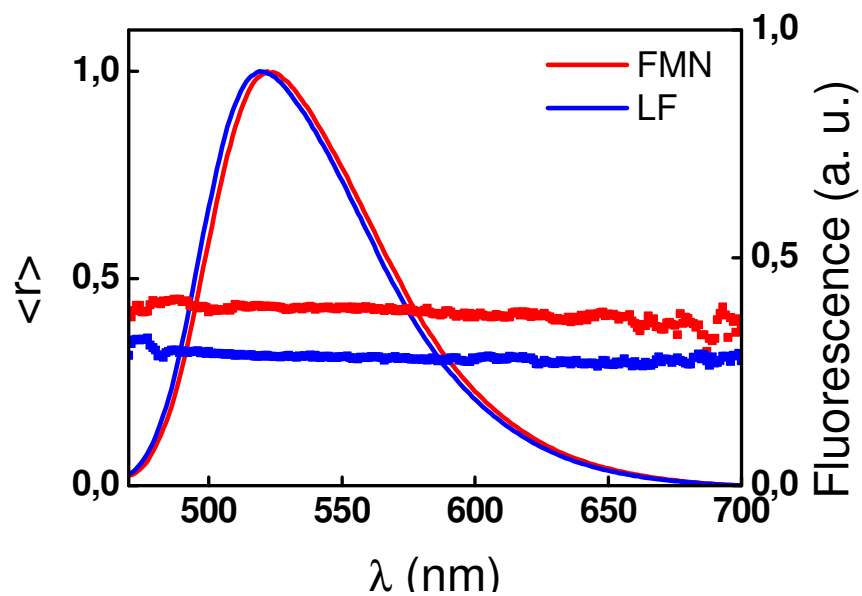

**Figure S3:** steady-state fluorescence anisotropy of 7  $\mu$ M FMN and LF in glycerol at 25°

C (excitation at 450nm, excitation and emission slits of 5 nm)

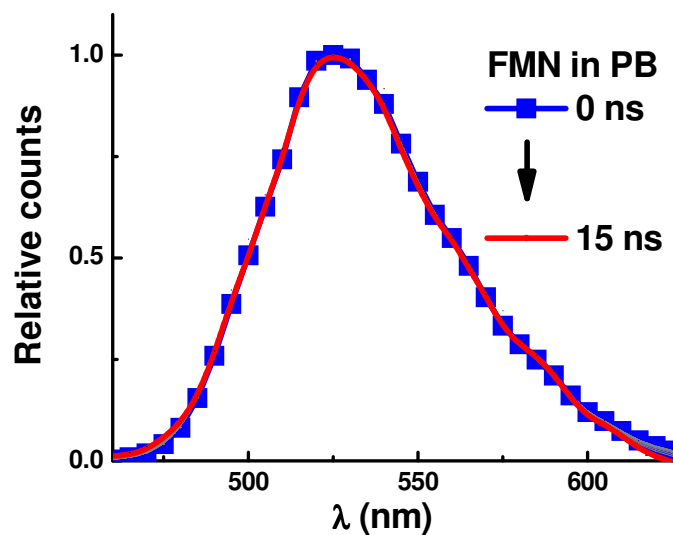

**Figure S4:** normalized time-resolved emission spectra (TRES) between 0 and 15 ns of 7  $\mu$ M FMN in 10 mM phosphate (PB) at pH 7. TRES were coincident with the steady-state spectrum in PB solutions.

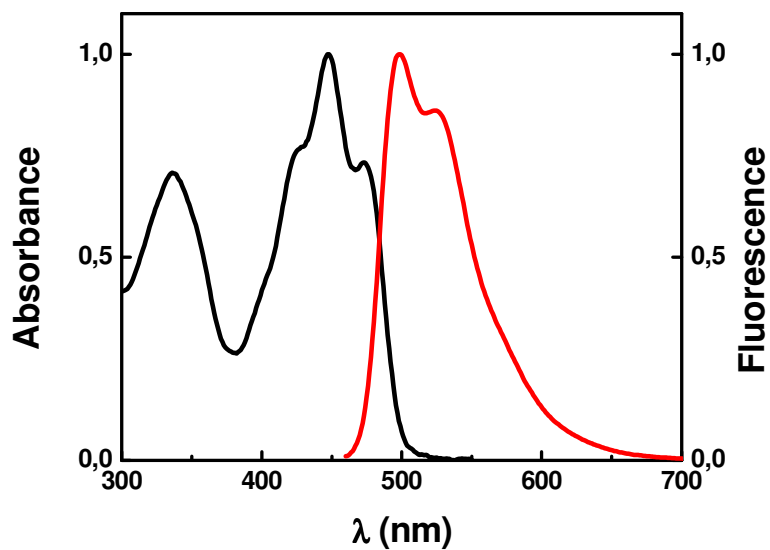

**Figure S5:** absorbance and fluorescence spectra of 7  $\mu$ M LF in toluene at 25  $^{\circ}$ C

(excitation at 450nm, excitation and emission slits of 5 nm)
